# Supplementary material for: Causal Relationships Between Glycemic Traits and Myopia
Source: PubMed Central journal article supplement — Invest Ophthalmol Vis Sci. 2023 Mar 3;64(3):7. doi: 10.1167/iovs.64.3.7 (PMC9988699; doi:10.1167/iovs.64.3.7), 2023-03-03
Supplement: iovs-64-3-7_s001.pdf [file iovs-64-3-7_s001.pdf]

**Supplementary Table S1. Effect of myopia on adiponectin and HbA1c.**

| <b>Outcomes</b>    | <b>SNPs</b> | <b>Methods</b>            | <b>OR</b> | <b>95% CI</b> | <b>P value</b> |
|--------------------|-------------|---------------------------|-----------|---------------|----------------|
| <b>Adiponectin</b> | 21          | Inverse variance weighted | 0.63      | 0.34-1.16     | 0.14           |
|                    |             | MR Egger                  | 0.53      | 0.06-4.60     | 0.57           |
|                    |             | Weighted median           | 0.66      | 0.34-1.30     | 0.23           |
|                    |             | Weighted mode             | 0.73      | 0.27-1.95     | 0.54           |
| <b>HbA1c</b>       | 28          | Inverse variance weighted | 1.04      | 0.83-1.31     | 0.70           |
|                    |             | MR Egger                  | 0.51      | 0.25-1.02     | 0.07           |
|                    |             | Weighted median           | 0.93      | 0.75-1.15     | 0.51           |
|                    |             | Weighted mode             | 0.90      | 0.62-1.30     | 0.59           |
